# Supplementary material for: Identification of robust genetic signatures associated with lipopolysaccharide-induced acute lung injury onset and astaxanthin therapeutic effects by integrative analysis of RNA sequencing data and GEO datasets
Source: publisher site journal article supplement (doi:10.18632/aging.104042), 2020-09-23
Supplement: Supplementary file [file aging-v12i18-104042-supplementary-material-SD2.pdf]

SUPPLEMENTARY FIGURES

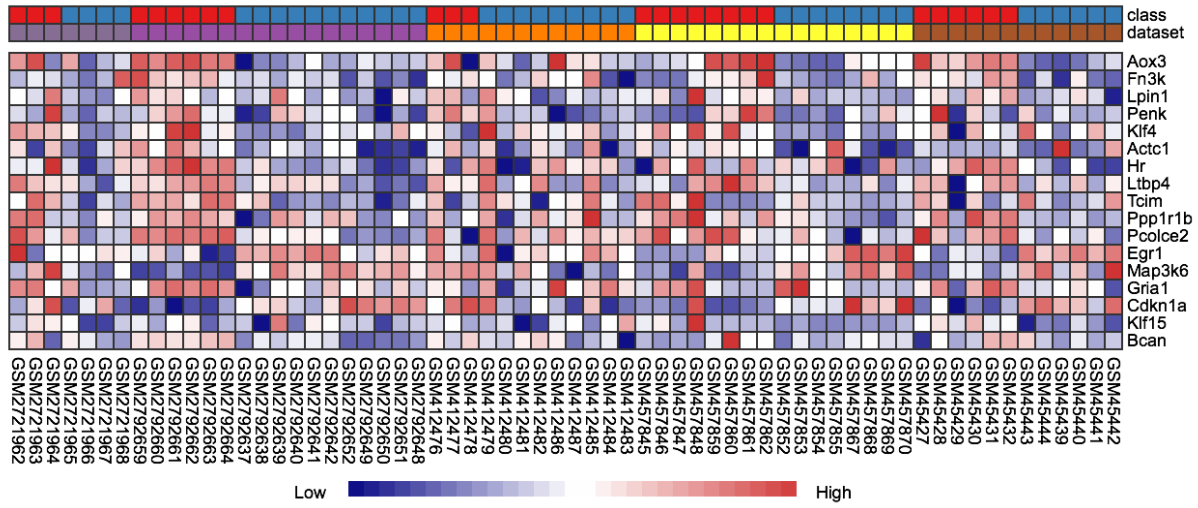

Supplementary Figure 1. Heat map of the 17 overlapping downregulated genes identified by both meta-analysis of published microarrays and our RNA sequencing experiments (control group vs. LPS group).

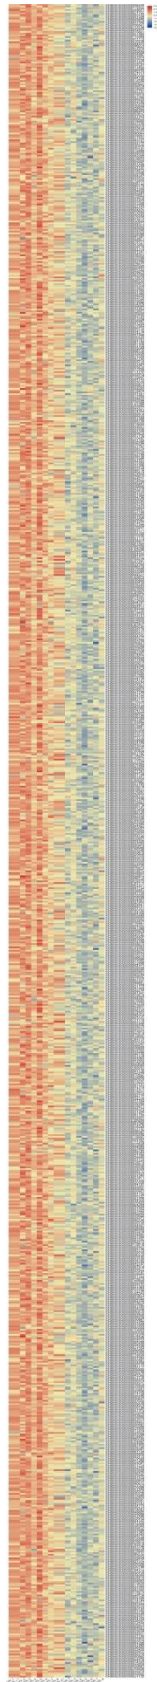

Supplementray Figure 2-1. Heat map of the 989 significantly upregulated genes in the LPS group compared to the control group identified by RNA sequencing.

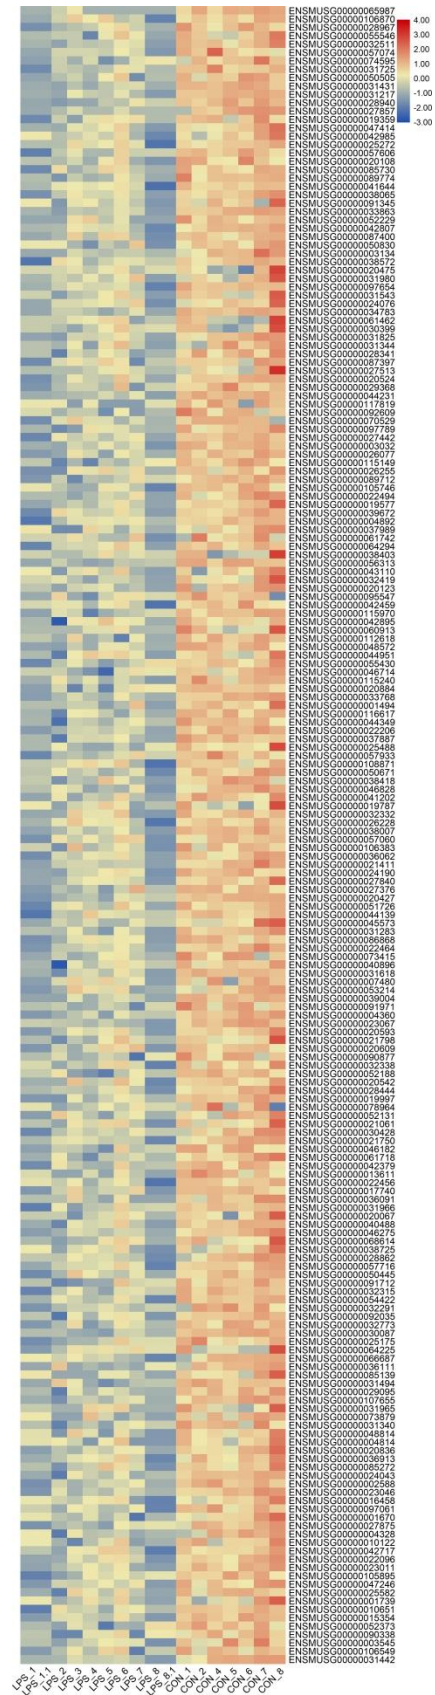

Supplementary Figure 2-2. Heat map of the 198 significantly downregulated genes in the LPS group compared to the control group identified by RNA sequencing.

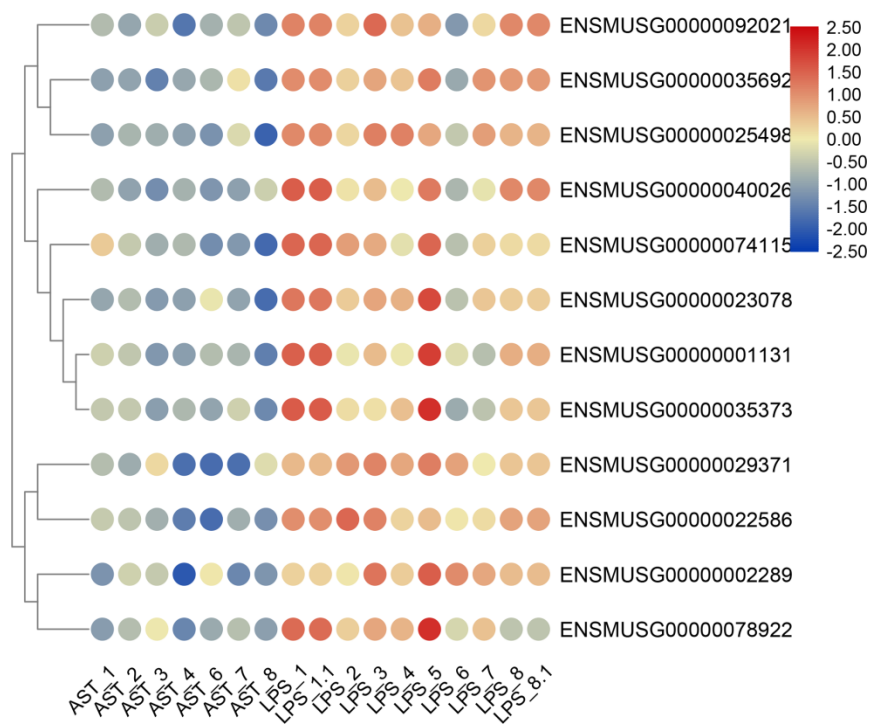

**Supplementary Figure 3-1. Heat map of the 9 significantly upregulated genes in the AST group compared to the LPS group identified by RNA sequencing.**

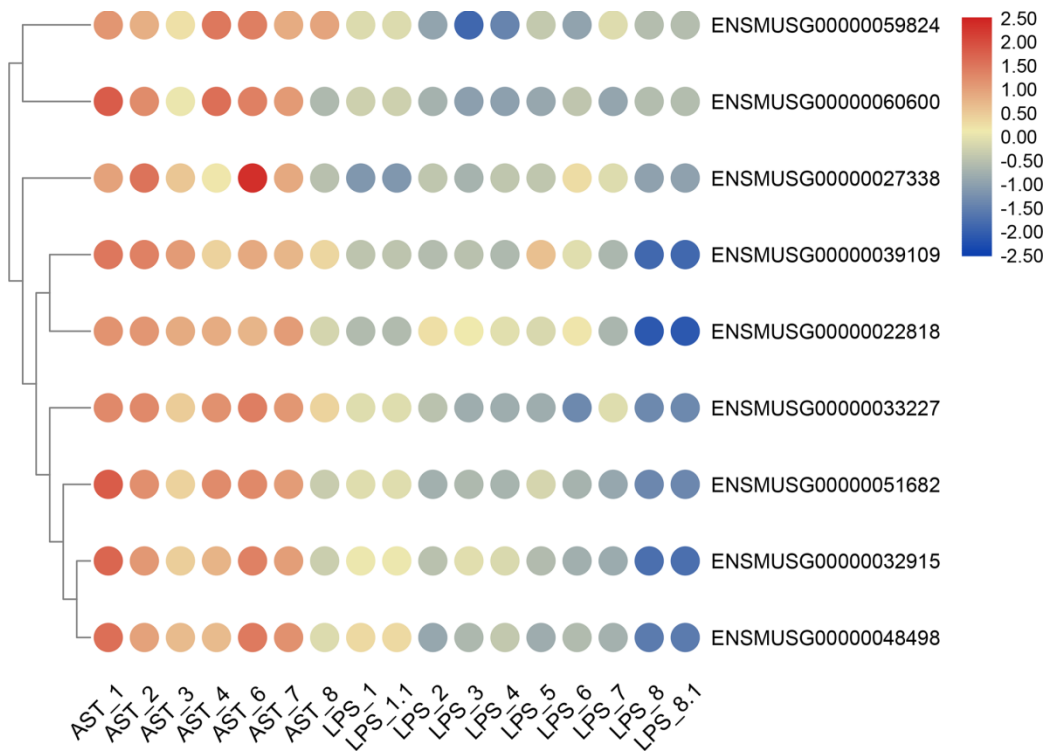

**Supplementary Figure 3-2. Heat map of the 12 significantly downregulated genes in the AST group compared to the LPS group identified RNA sequencing.**

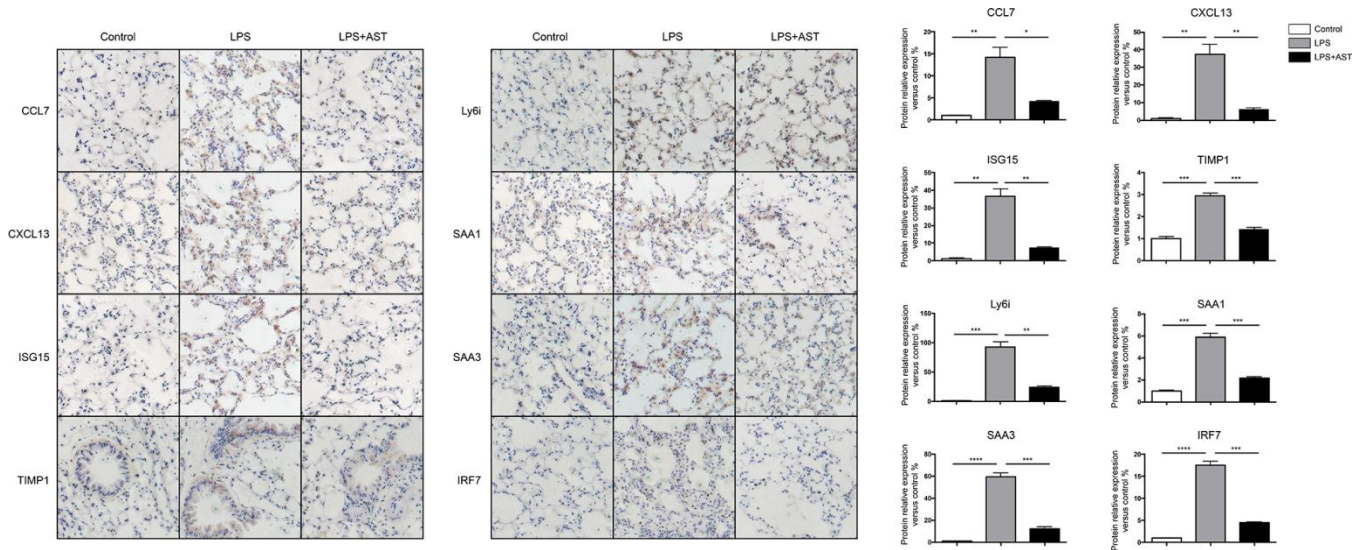

**Supplementary Figure 4. Expression of the 8 core genes (*Ccl7*, *Saa3*, *Ly6i*, *Saa1*, *Irf7*, *Timp1*, *Isg15* and *Cxcl13*) determined by immunohistochemistry.** Statistical analysis of the differences between groups was achieved with one-way ANOVA using Prism 7 software. \*\*\*\*p < 0.0001, \*\*\*p < 0.001, \*\*p < 0.01, and \*p < 0.05 were considered statistically significant.
